# Supplementary material for: Antimicrobial Susceptibility Testing Performed in RPMI 1640 Reveals Azithromycin Efficacy against Carbapenem-Resistant Acinetobacter baumannii and Predicts In Vivo Outcomes in Galleria mellonella
Source: PubMed Central journal article supplement (PMC9872712; doi:10.1128/aac.01320-22), 2022-12-05
Supplement: aac.01320-22-s0001.pdf [file aac.01320-22-s0001.pdf]

## Supplemental Table 1

Strain identification

| Strain | Origin                  | Harbors known macrolide resistance gene? | COL  | CLSI breakpoint interpretation ( <i>A. baumannii</i> ) | RPMI       | CLSI breakpoint interpretation ( <i>A. baumannii</i> in MHII) | AZM  | CLSI breakpoint interpretation ( <i>H. influenzae</i> ) | RPMI       | CLSI breakpoint interpretation ( <i>H. influenzae</i> in MHII) |
|--------|-------------------------|------------------------------------------|------|--------------------------------------------------------|------------|---------------------------------------------------------------|------|---------------------------------------------------------|------------|----------------------------------------------------------------|
|        |                         |                                          | MHII |                                                        | MIC (mg/L) |                                                               | MHII |                                                         | MIC (mg/L) |                                                                |
| 33     | CDC-FDA AR Isolate Bank | None                                     | 0.13 | I                                                      | 0.25       | I                                                             | 2    | S                                                       | 0.25       | S                                                              |
| 36     | CDC-FDA AR Isolate Bank | None                                     | 0.13 | I                                                      | 0.5        | I                                                             | 64   | R                                                       | No growth  |                                                                |
| 37     | CDC-FDA AR Isolate Bank | None                                     | 0.13 | I                                                      | 0.25       | I                                                             | 2    | S                                                       | No growth  |                                                                |
| 45     | CDC-FDA AR Isolate Bank | None                                     | 0.13 | I                                                      | 0.5        | I                                                             | 32   | R                                                       | 0.25       | S                                                              |
| 52     | CDC-FDA AR Isolate Bank | None                                     | 0.13 | I                                                      | 0.25       | I                                                             | 4    | S                                                       | 0.13       | S                                                              |
| 63     | CDC-FDA AR Isolate Bank | None                                     | 0.13 | I                                                      | 0.5        | I                                                             | 32   | R                                                       | 0.5        | S                                                              |
| 70     | CDC-FDA AR Isolate Bank | None                                     | 0.13 | I                                                      | 0.25       | I                                                             | 4    | S                                                       | 0.13       | S                                                              |
| 88     | CDC-FDA AR Isolate Bank | None                                     | 0.25 | I                                                      | 1          | I                                                             | 16   | R                                                       | 0.13       | S                                                              |
| 101    | CDC-FDA AR Isolate Bank | None                                     | 1    | I                                                      | 1          | I                                                             | >64  | R                                                       | 1          | S                                                              |
| 273    | CDC-FDA AR Isolate Bank | None                                     | 0.13 | I                                                      | 0.25       | I                                                             | 64   | R                                                       | 0.5        | S                                                              |
| 274    | CDC-FDA AR Isolate Bank | None                                     | 0.25 | I                                                      | 1          | I                                                             | 16   | R                                                       | 0.25       | S                                                              |
| 277    | CDC-FDA AR Isolate Bank | None                                     | 0.25 | I                                                      | 1          | I                                                             | >64  | R                                                       | 0.5        | S                                                              |
| 281    | CDC-FDA AR Isolate Bank | None                                     | 0.25 | I                                                      | 2          | I                                                             | 64   | R                                                       | 0.5        | S                                                              |
| 284    | CDC-FDA AR Isolate Bank | None                                     | 0.25 | I                                                      | 1          | I                                                             | >64  | R                                                       | 1          | S                                                              |
| 285    | CDC-FDA AR Isolate Bank | None                                     | 0.25 | I                                                      | 1          | I                                                             | 64   | R                                                       | 0.5        | S                                                              |
| 287    | CDC-FDA AR Isolate Bank | None                                     | 0.25 | I                                                      | No growth  |                                                               | 64   | R                                                       | No growth  |                                                                |
| 292    | CDC-FDA AR Isolate Bank | None                                     | 0.25 | I                                                      | 1          | I                                                             | 32   | R                                                       | 0.5        | S                                                              |
| 294    | CDC-FDA AR Isolate Bank | None                                     | 0.25 | I                                                      | 1          | I                                                             | 4    | S                                                       | 0.5        | S                                                              |
| 295    | CDC-FDA AR Isolate Bank | None                                     | 0.25 | I                                                      | No growth  |                                                               | 64   | R                                                       | No growth  |                                                                |
| 296    | CDC-FDA AR Isolate Bank | None                                     | 0.13 | I                                                      | 0.5        | I                                                             | 64   | R                                                       | 0.25       | S                                                              |

## Supplemental Table 1

Strain identification

| Strain | Origin                  | Harbors known macrolide resistance gene? | COL  |      |            | AZM  |      |            | CLSI breakpoint interpretation ( <i>H. influenzae</i> in MHII) | CLSI breakpoint interpretation ( <i>H. influenzae</i> in MHII) |
|--------|-------------------------|------------------------------------------|------|------|------------|------|------|------------|----------------------------------------------------------------|----------------------------------------------------------------|
|        |                         |                                          | MHII | RPMI | MIC (mg/L) | MHII | RPMI | MIC (mg/L) |                                                                |                                                                |
| 305    | CDC-FDA AR Isolate Bank | None                                     | 0.25 | I    | 1          | I    | 64   | R          | 1                                                              | S                                                              |
| 306    | CDC-FDA AR Isolate Bank | None                                     | 1    | I    | 1          | I    | 64   | R          | 1                                                              | S                                                              |
| 312    | CDC-FDA AR Isolate Bank | None                                     | 0.13 | I    | 1          | I    | 32   | R          | 0.25                                                           | S                                                              |
| 313    | CDC-FDA AR Isolate Bank | None                                     | 0.25 | I    | 1          | I    | 64   | R          | 0.5                                                            | S                                                              |
| 56     | CDC-FDA AR Isolate Bank | <i>mphE, msrE</i>                        | 1    | I    | 1          | I    | >64  | R          | 32                                                             | R                                                              |
| 288    | CDC-FDA AR Isolate Bank | <i>mphE, msrE</i>                        | >64  | R    | 1          | I    | >64  | R          | 32                                                             | R                                                              |
| 289    | CDC-FDA AR Isolate Bank | None                                     | 4    | R    | 1          | I    | 64   | R          | 0.5                                                            | S                                                              |
| 303    | CDC-FDA AR Isolate Bank | <i>mphE, msrE</i>                        | >64  | R    | 2          | I    | >64  | R          | 32                                                             | R                                                              |
| 304    | CDC-FDA AR Isolate Bank | None                                     | 8    | R    | 0.5        | I    | 32   | R          | 1                                                              | S                                                              |
| 307    | CDC-FDA AR Isolate Bank | <i>mphE, msrE</i>                        | >64  | R    | 1          | I    | >64  | R          | 64                                                             | R                                                              |
| 308    | CDC-FDA AR Isolate Bank | <i>mphE, msrE</i>                        | 32   | R    | 1          | I    | >64  | R          | 32                                                             | R                                                              |
| 309    | CDC-FDA AR Isolate Bank | <i>mphE, msrE</i>                        | 16   | R    | 2          | I    | >64  | R          | 32                                                             | R                                                              |
| 310    | CDC-FDA AR Isolate Bank | <i>mphE, msrE</i>                        | 4    | R    | 4          | R    | >64  | R          | 32                                                             | R                                                              |
| 35     | CDC-FDA AR Isolate Bank | <i>mphE, msrE</i>                        | 0.13 | I    | 1          | I    | >64  | R          | 64                                                             | R                                                              |
| 78     | CDC-FDA AR Isolate Bank | <i>mphE, msrE</i>                        | 0.5  | I    | 2          | I    | >64  | R          | 64                                                             | R                                                              |
| 83     | CDC-FDA AR Isolate Bank | <i>mphE, msrE</i>                        | 0.25 | I    | 2          | I    | >64  | R          | 64                                                             | R                                                              |
| 275    | CDC-FDA AR Isolate Bank | <i>mphE, msrE</i>                        | 0.25 | I    | 1          | I    | >64  | R          | 64                                                             | R                                                              |
| 278    | CDC-FDA AR Isolate Bank | <i>mphE, msrE</i>                        | 0.5  | I    | 1          | I    | >64  | R          | 64                                                             | R                                                              |
| 279    | CDC-FDA AR Isolate Bank | <i>mphE, msrE</i>                        | 0.25 | I    | 1          | I    | >64  | R          | 64                                                             | R                                                              |
| 282    | CDC-FDA AR Isolate Bank | <i>mphE, msrE</i>                        | 0.25 | I    | 2          | I    | >64  | R          | 64                                                             | R                                                              |

## Supplemental Table 1

Strain identification

| Strain    | Origin                                                    | Harbors known macrolide resistance gene? | COL  |      |            | AZM  |      |            | CLSI breakpoint interpretation ( <i>H. influenzae</i> in MHII) | CLSI breakpoint interpretation ( <i>H. influenzae</i> in MHII) |
|-----------|-----------------------------------------------------------|------------------------------------------|------|------|------------|------|------|------------|----------------------------------------------------------------|----------------------------------------------------------------|
|           |                                                           |                                          | MHII | RPMI | MIC (mg/L) | MHII | RPMI | MIC (mg/L) |                                                                |                                                                |
| 283       | CDC-FDA AR Isolate Bank                                   | <i>mphE, msrE</i>                        | 0.5  | I    | 1          | I    | >64  | R          | 64                                                             | R                                                              |
| 286       | CDC-FDA AR Isolate Bank                                   | <i>mphE, msrE</i>                        | 0.25 | I    | 1          | I    | >64  | R          | 64                                                             | R                                                              |
| 290       | CDC-FDA AR Isolate Bank                                   | <i>mphE, msrE</i>                        | 0.25 | I    | 1          | I    | >64  | R          | 64                                                             | R                                                              |
| 291       | CDC-FDA AR Isolate Bank                                   | <i>mphE, msrE</i>                        | 0.25 | I    | 2          | I    | >64  | R          | 64                                                             | R                                                              |
| 297       | CDC-FDA AR Isolate Bank                                   | <i>mphE, msrE</i>                        | 0.25 | I    | 1          | I    | >64  | R          | 32                                                             | R                                                              |
| 298       | CDC-FDA AR Isolate Bank                                   | <i>mphE, msrE</i>                        | 0.13 | I    | 1          | I    | >64  | R          | 64                                                             | R                                                              |
| 299       | CDC-FDA AR Isolate Bank                                   | <i>mphE, msrE</i>                        | 1    | I    | 4          | R    | >64  | R          | No growth                                                      |                                                                |
| 301       | CDC-FDA AR Isolate Bank                                   | <i>mphE, msrE</i>                        | 0.13 | I    | 1          | I    | >64  | R          | 32                                                             | R                                                              |
| 302       | CDC-FDA AR Isolate Bank                                   | <i>mphE, msrE</i>                        | 0.5  | I    | 2          | I    | >64  | R          | 64                                                             | R                                                              |
| 311       | CDC-FDA AR Isolate Bank                                   | <i>mphE, msrE</i>                        | 0.13 | I    | 1          | I    | >64  | R          | 32                                                             | R                                                              |
| LAC4 WT   | Cal State LA (Dr. Howard Xu) [Valentine '08 J Clin Micro] | Not sequenced                            | 0.13 | I    | 1          | I    | 2    | S          | 0.25                                                           | S                                                              |
| LAC4 ColR | Generated in-house                                        | Not sequenced                            | 1    | I    | 64         | R    | 4    | S          | 0.5                                                            | S                                                              |
| HUMC1     | Harbor UCLA Medical Center [Luo '12 PLoS One]             | Not sequenced                            | 0.25 | I    | 0.5        | I    | >64  | R          | 64                                                             | R                                                              |
| VA-Ab07   | Case Western Reserve University (Dr. Robert Bonomo)       | Not sequenced                            | 0.13 | I    | 1          | I    | >64  | R          | >64                                                            | R                                                              |
| VA-Ab08   | Case Western Reserve University (Dr. Robert Bonomo)       | Not sequenced                            | 0.13 | I    | 1          | I    | >64  | R          | 64                                                             | R                                                              |

## Supplemental Table 1

Strain identification

| Strain  | Origin                                              | Harbors known macrolide resistance gene? | COL        |      |                                                        | AZM  |            |                                                         |            |      |
|---------|-----------------------------------------------------|------------------------------------------|------------|------|--------------------------------------------------------|------|------------|---------------------------------------------------------|------------|------|
|         |                                                     |                                          | MHII       | RPMI | CLSI breakpoint interpretation ( <i>A. baumannii</i> ) | MHII | RPMI       | CLSI breakpoint interpretation ( <i>H. influenzae</i> ) | MHII       | RPMI |
|         |                                                     |                                          | MIC (mg/L) |      | MIC (mg/L)                                             |      | MIC (mg/L) |                                                         | MIC (mg/L) |      |
| VA-Ab11 | Case Western Reserve University (Dr. Robert Bonomo) | Not sequenced                            | >64        | R    | 0.5                                                    | I    | 64         | R                                                       | 0.5        | S    |
| VA-Ab15 | Case Western Reserve University (Dr. Robert Bonomo) | Not sequenced                            | >64        | R    | 0.5                                                    | I    | 64         | R                                                       | 0.5        | S    |
| VA-Ab17 | Case Western Reserve University (Dr. Robert Bonomo) | Not sequenced                            | 1          | I    | 1                                                      | I    | >64        | R                                                       | 32         | R    |
| VA-Ab23 | Case Western Reserve University (Dr. Robert Bonomo) | Not sequenced                            | 0.13       | I    | 1                                                      | I    | 64         | R                                                       | 0.5        | S    |
| VA-Ab39 | Case Western Reserve University (Dr. Robert Bonomo) | Not sequenced                            | 1          | I    | 1                                                      | I    | 32         | R                                                       | 0.13       | S    |
| VA-Ab55 | Case Western Reserve University (Dr. Robert Bonomo) | Not sequenced                            | 1          | I    | 0.5                                                    | I    | >64        | R                                                       | 64         | R    |
| VA-Ab58 | Case Western Reserve University (Dr. Robert Bonomo) | Not sequenced                            | 0.25       | I    | 0.5                                                    | I    | >64        | R                                                       | >64        | R    |
| VA-Ab59 | Case Western Reserve University (Dr. Robert Bonomo) | Not sequenced                            | 0.13       | I    | 0.5                                                    | I    | >64        | R                                                       | >64        | R    |

## Supplemental Table 1

Strain identification

| Strain  | Origin                                              | Harbors known macrolide resistance gene? | COL        |            |                                                        | AZM        |            |                                                         |            |            |                                                                |
|---------|-----------------------------------------------------|------------------------------------------|------------|------------|--------------------------------------------------------|------------|------------|---------------------------------------------------------|------------|------------|----------------------------------------------------------------|
|         |                                                     |                                          | MHII       | RPMI       | CLSI breakpoint interpretation ( <i>A. baumannii</i> ) | MHII       | RPMI       | CLSI breakpoint interpretation ( <i>H. influenzae</i> ) | MHII       | RPMI       | CLSI breakpoint interpretation ( <i>H. influenzae</i> in MHII) |
|         |                                                     |                                          | MIC (mg/L) | MIC (mg/L) | MIC (mg/L)                                             | MIC (mg/L) | MIC (mg/L) | MIC (mg/L)                                              | MIC (mg/L) | MIC (mg/L) | MIC (mg/L)                                                     |
| VA-Ab64 | Case Western Reserve University (Dr. Robert Bonomo) | Not sequenced                            | 0.25       | 1          | I                                                      | >64        | >64        | R                                                       | >64        | >64        | R                                                              |
| VA-Ab65 | Case Western Reserve University (Dr. Robert Bonomo) | Not sequenced                            | 0.25       | 1          | I                                                      | >64        | >64        | R                                                       | >64        | >64        | R                                                              |
| VA-Ab68 | Case Western Reserve University (Dr. Robert Bonomo) | Not sequenced                            | 0.5        | 1          | I                                                      | 64         | 64         | R                                                       | 0.5        | 0.5        | S                                                              |
| VA-Ab71 | Case Western Reserve University (Dr. Robert Bonomo) | Not sequenced                            | 0.5        | 1          | I                                                      | >64        | >64        | R                                                       | 64         | 64         | R                                                              |
| VA-Ab72 | Case Western Reserve University (Dr. Robert Bonomo) | Not sequenced                            | 0.25       | 2          | I                                                      | 32         | 32         | R                                                       | 0.25       | 0.25       | S                                                              |
| VA-Ab73 | Case Western Reserve University (Dr. Robert Bonomo) | Not sequenced                            | 1          | 0.25       | I                                                      | 0.5        | 0.5        | S                                                       | 0.13       | 0.13       | S                                                              |
| VA-Ab74 | Case Western Reserve University (Dr. Robert Bonomo) | Not sequenced                            | 0.5        | 8          | I                                                      | 0.5        | 0.5        | S                                                       | 4          | 4          | S                                                              |
| VA-Ab75 | Case Western Reserve University (Dr. Robert Bonomo) | Not sequenced                            | 0.5        | 64         | I                                                      | 0.5        | 0.5        | S                                                       | 64         | 64         | R                                                              |
